# Supplementary material for: Calcium modulates the tethering of BCOR-PRC1.1 enzymatic core to KDM2B via liquid-liquid phase separation
Source: PubMed Central journal article supplement — Commun Biol. 2024 Sep 10;7:1112. doi: 10.1038/s42003-024-06820-3 (PMC11387744; doi:10.1038/s42003-024-06820-3), 2024-09-10

# Uncropped western blot images for Figure1E

Input

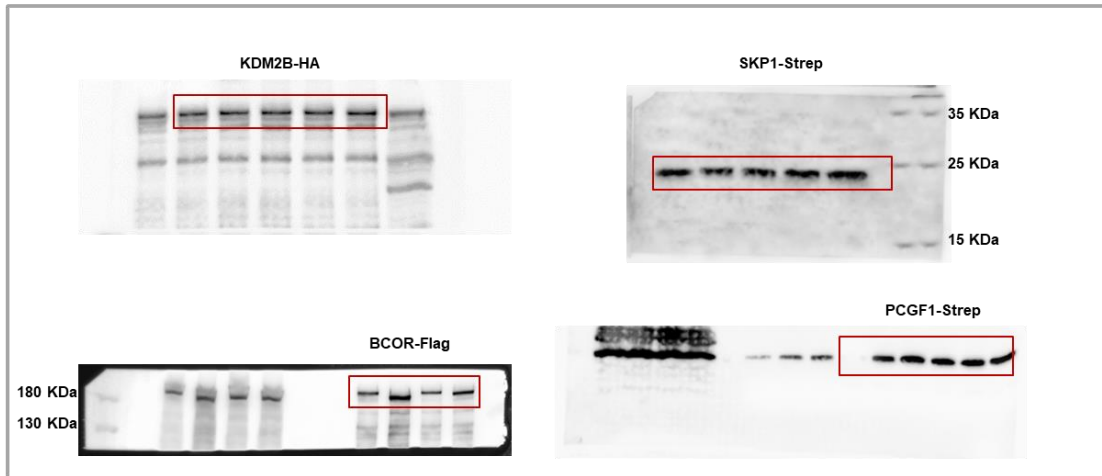

IP: Flag

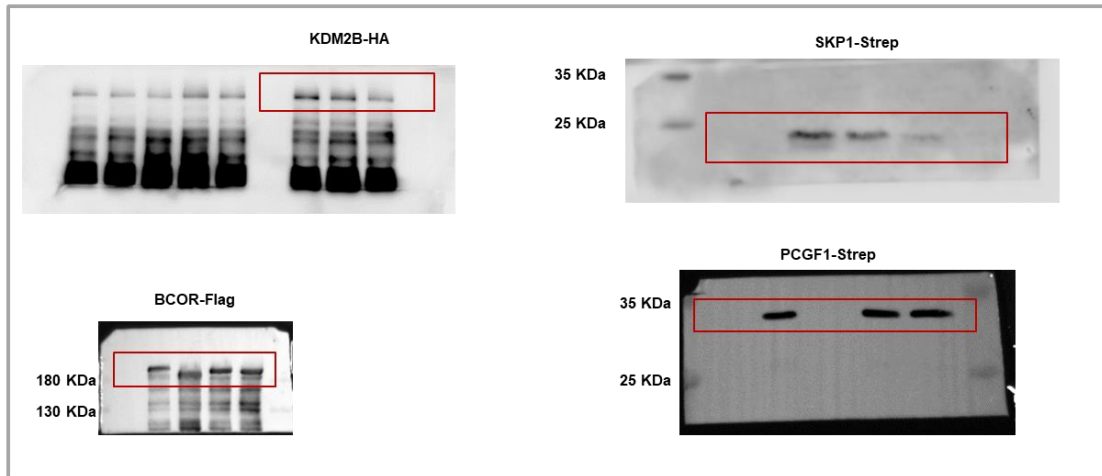

Uncropped western blot images for the repeated date of Figure1E

(1)

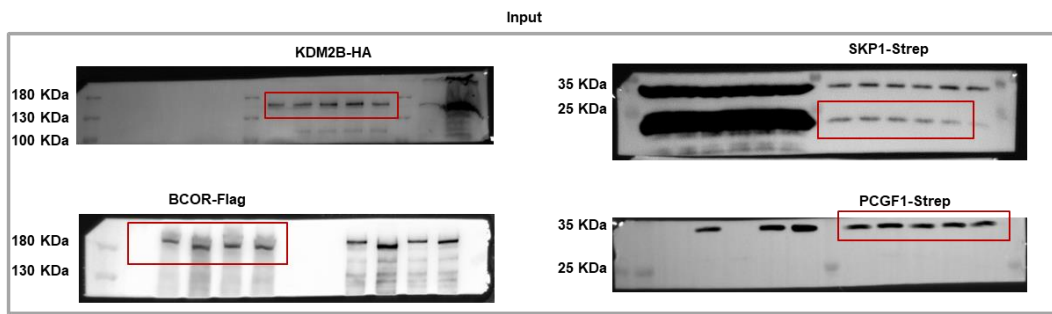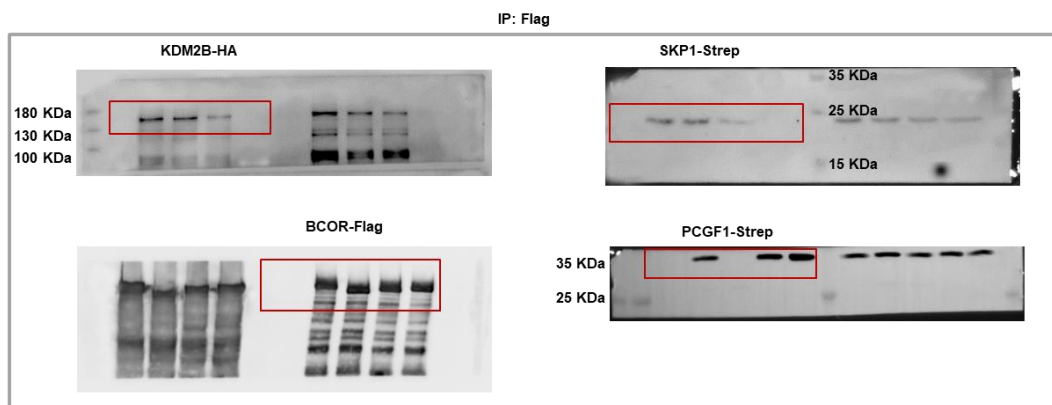

(2)

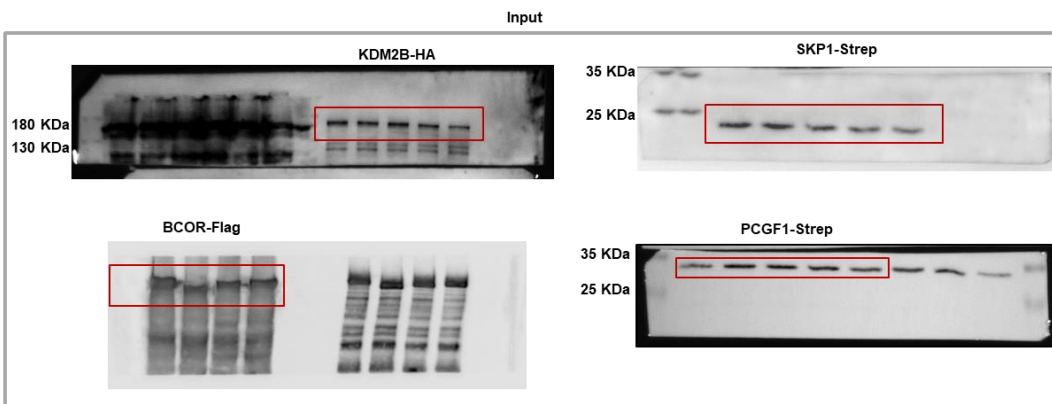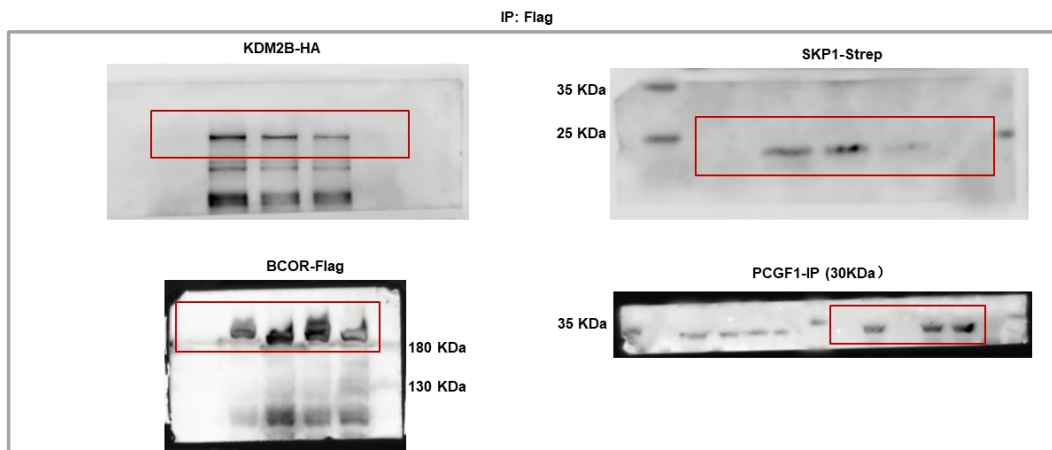

## Uncropped western blot images for Figure4A

Input

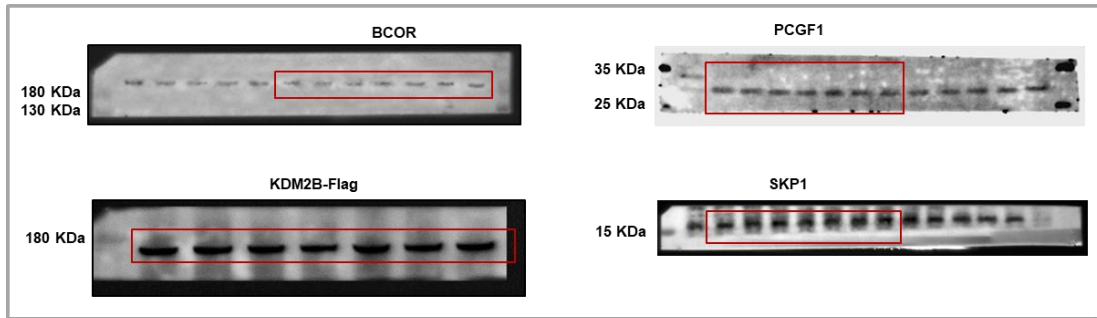

IP: Flag

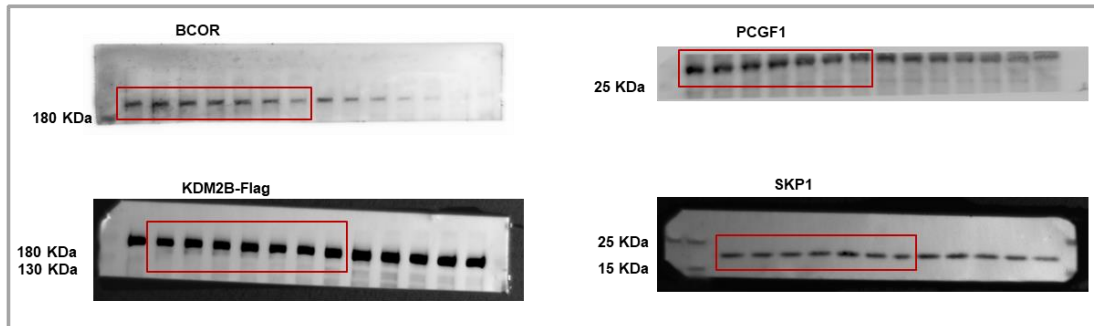

Uncropped western blot images for the repeated date of Figure4A

(1)

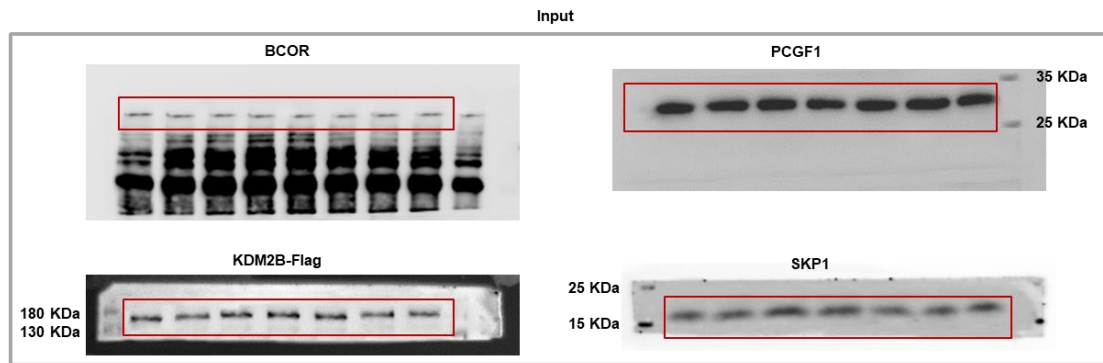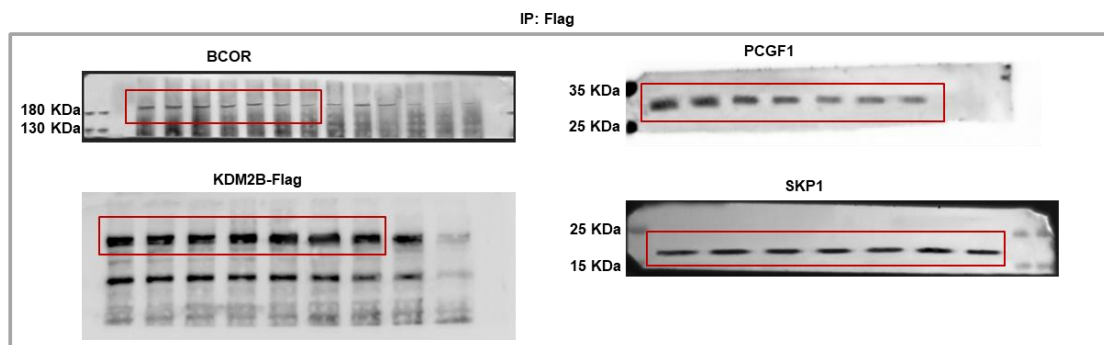

(2)

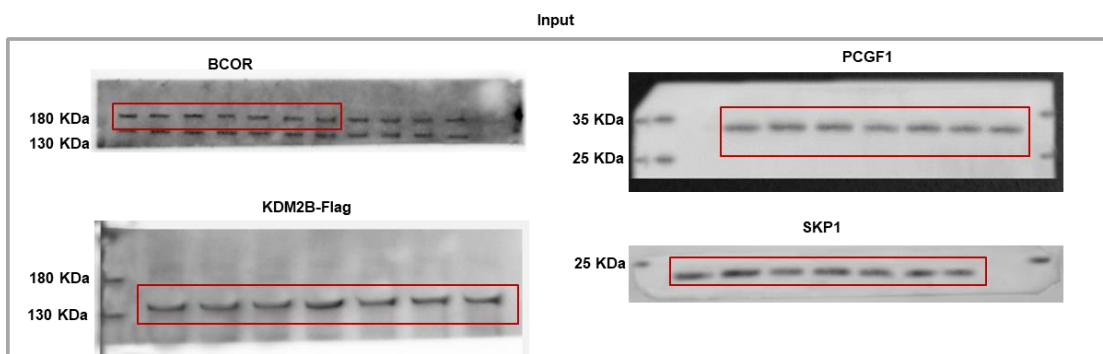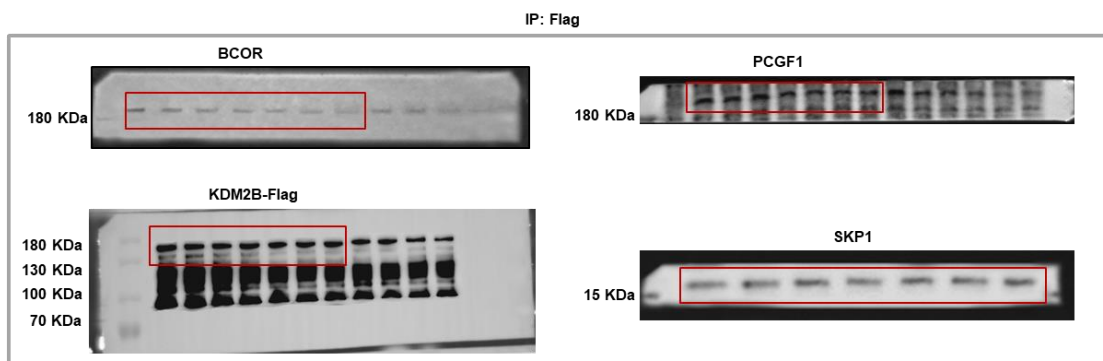

# Uncropped western blot images for Figure4C

Input

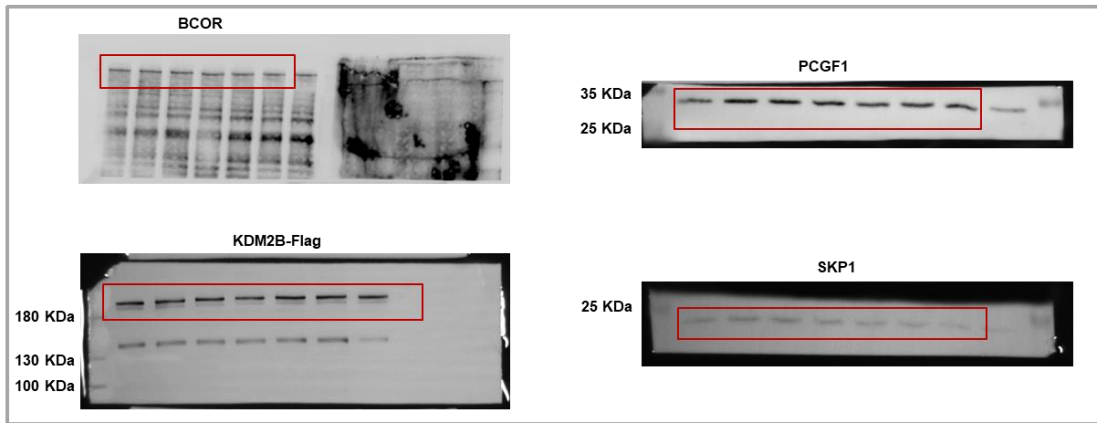

IP: Flag

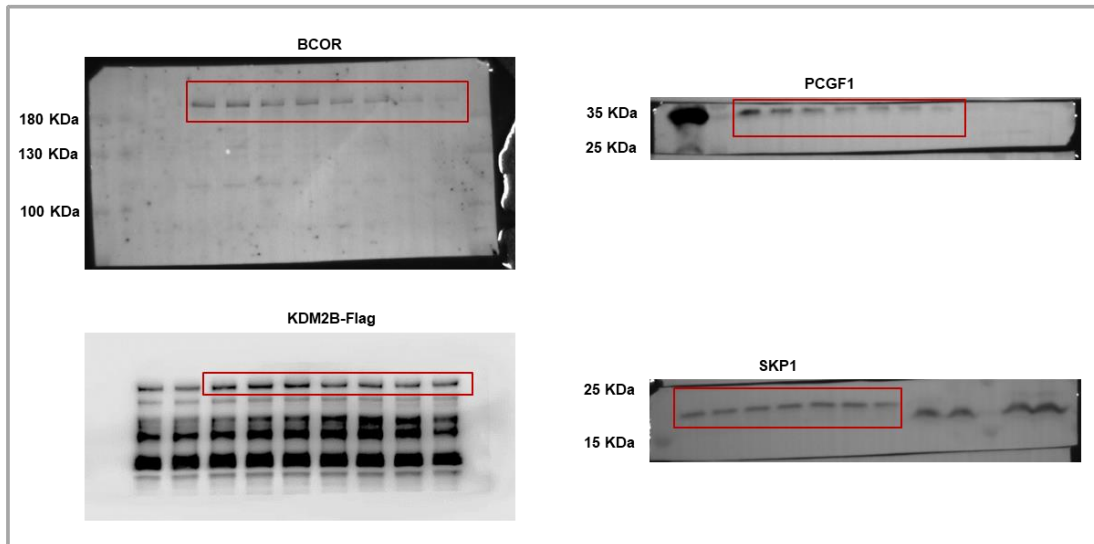

Uncropped western blot images for the repeated date of Figure4C

(1)

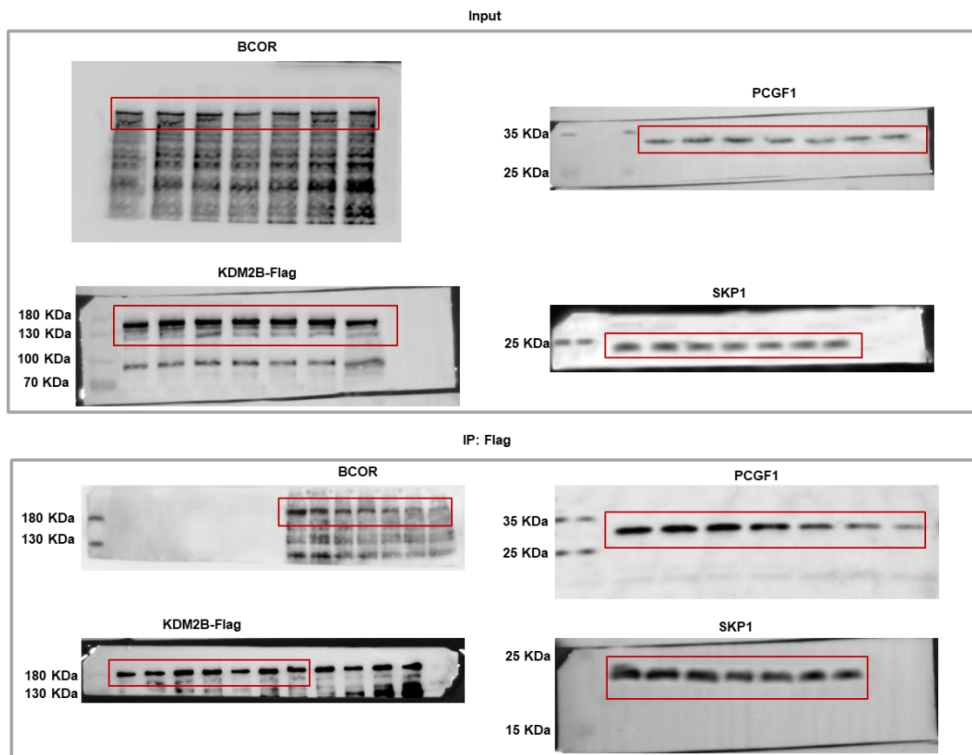

(2)

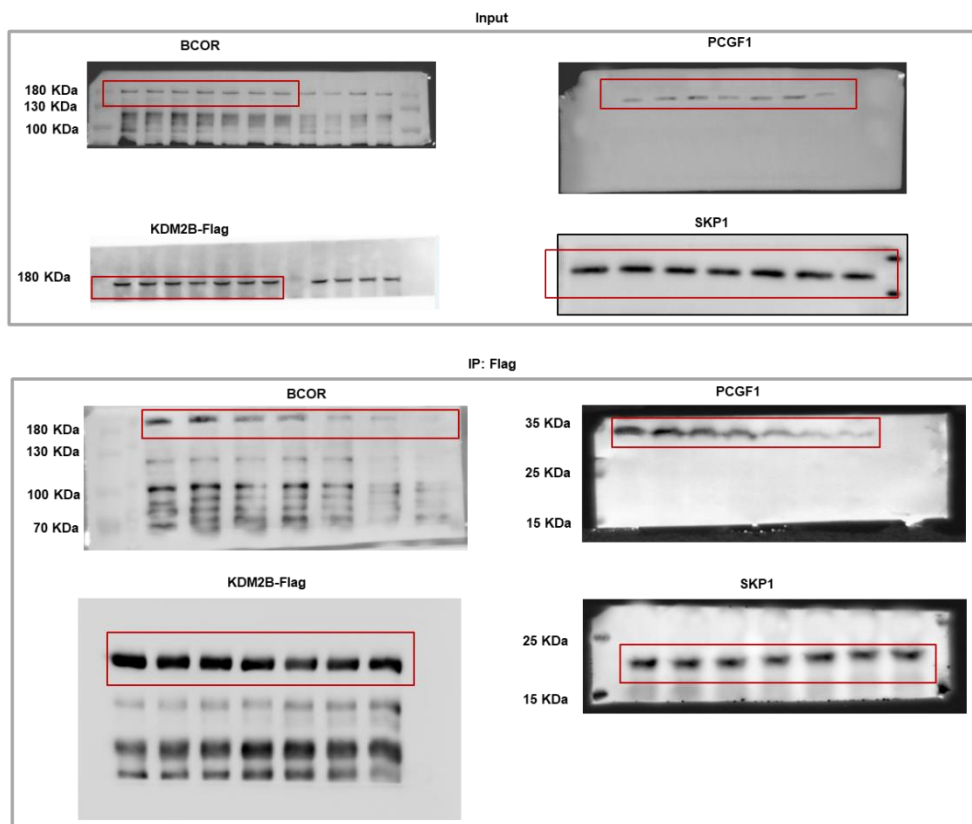

# Uncropped western blot images for Supplementary Figure 7

Input

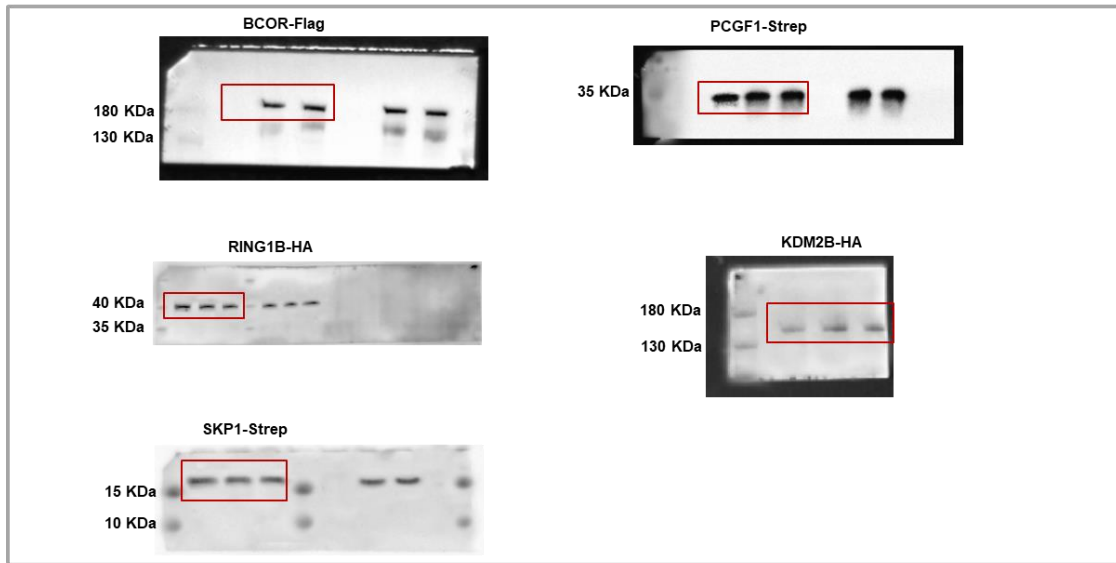

IP: Flag

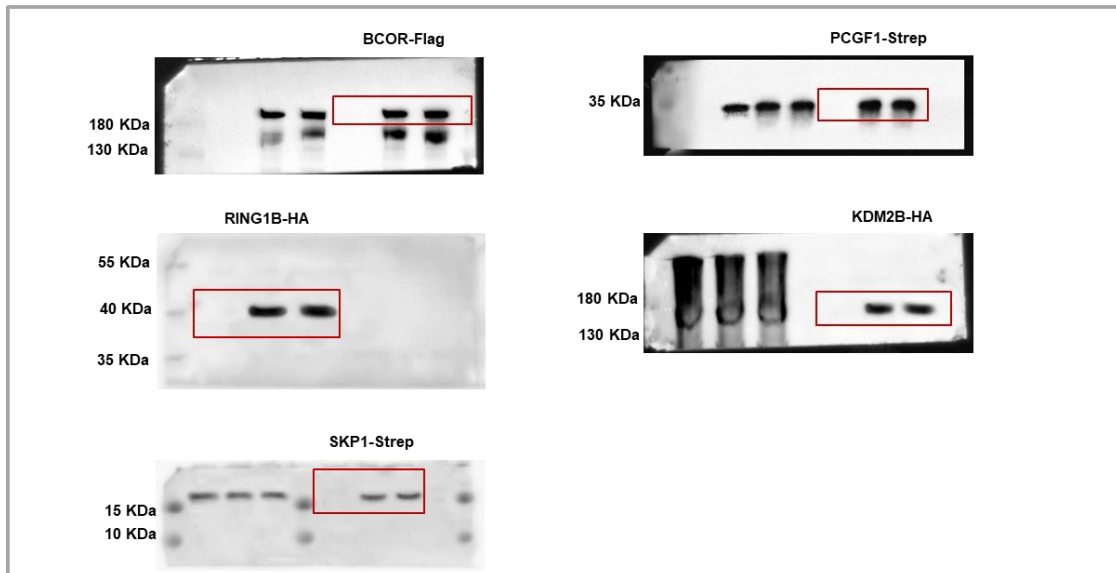

Uncropped western blot images for the repeated data of Supplementary Figure 7

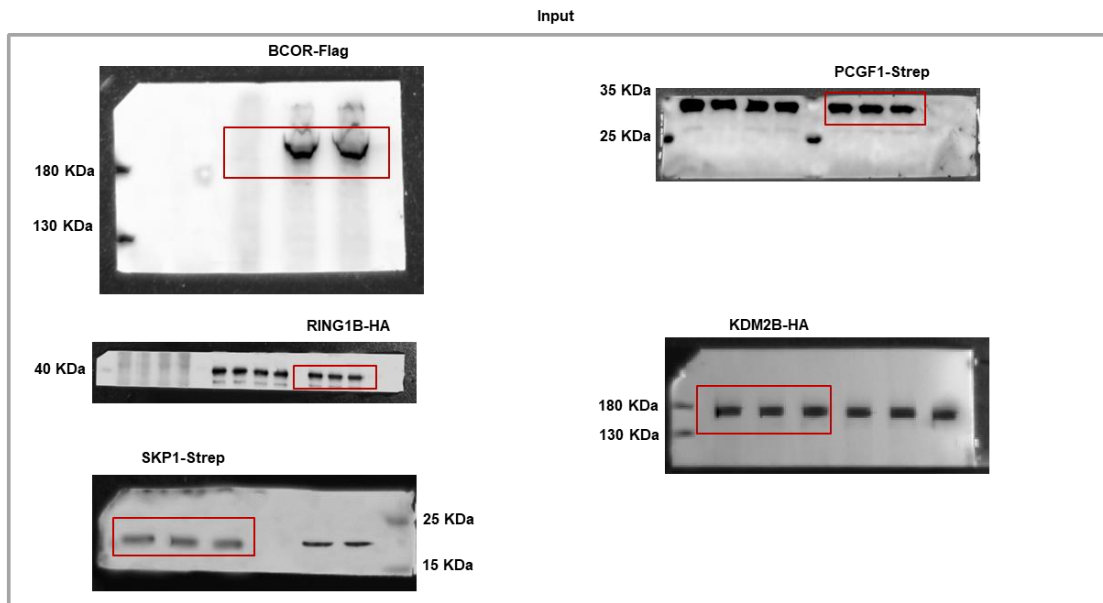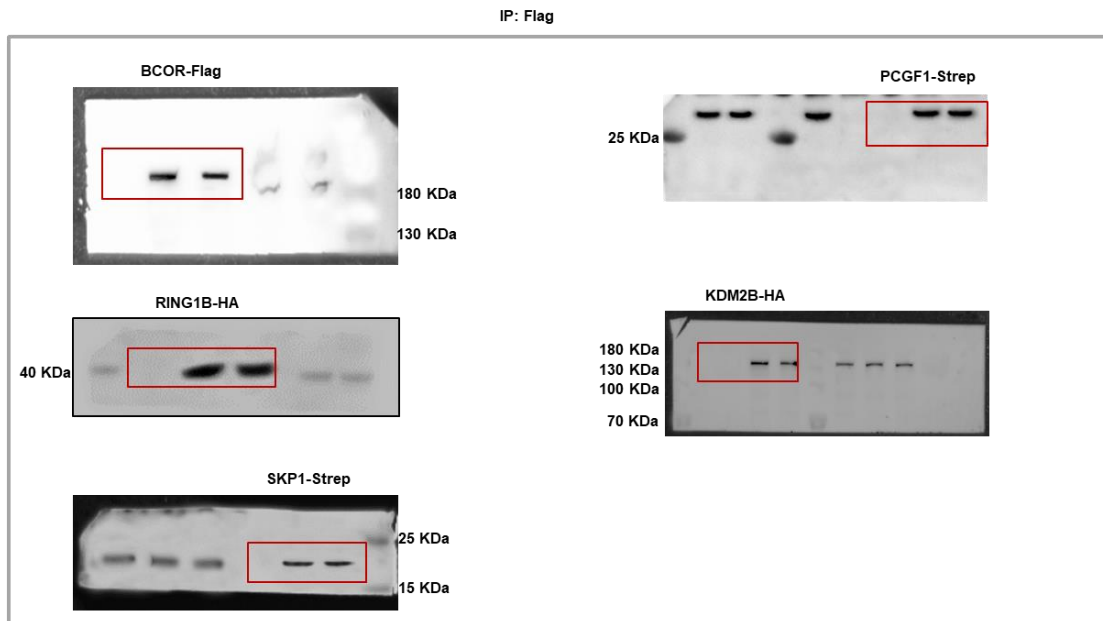



## Uncropped western blot images for Supplementary Figure 8

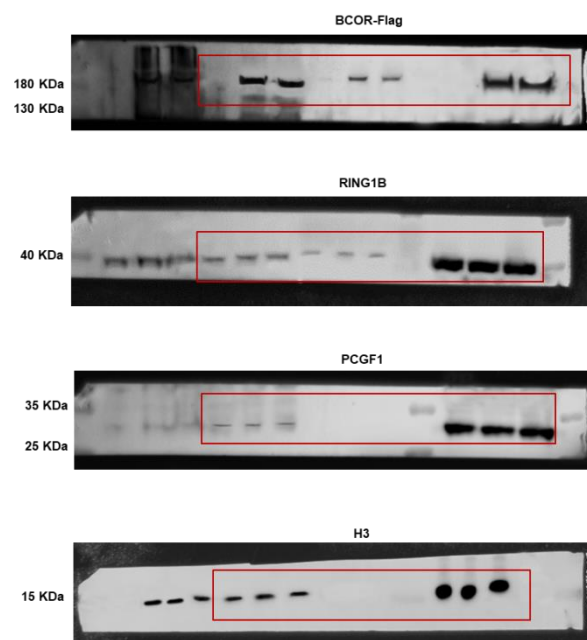

Uncropped western blot images for the repeated data of Supplementary Figure 8

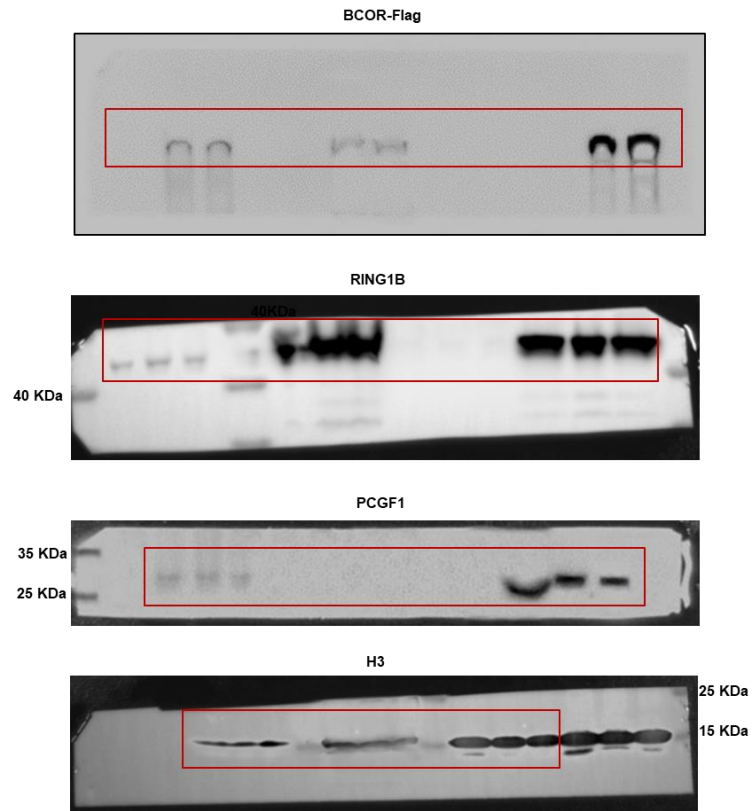

**Uncropped western blot images for Supplementary Figure 9**

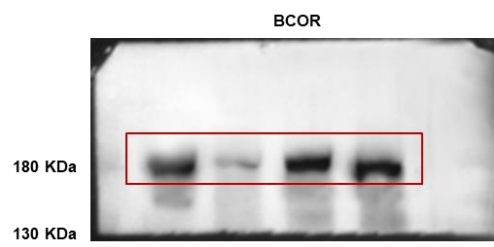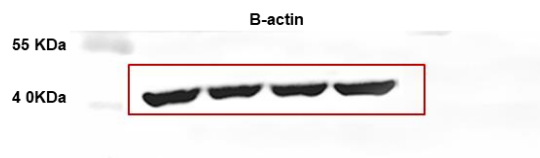

Supplement: 42003_2024_6820_MOESM6_ESM.pdf [file 42003_2024_6820_MOESM6_ESM.pdf]
