# Supplementary material for: Calcium modulates the tethering of BCOR-PRC1.1 enzymatic core to KDM2B via liquid-liquid phase separation
Source: PubMed Central journal article supplement — Commun Biol. 2024 Sep 10;7:1112. doi: 10.1038/s42003-024-06820-3 (PMC11387744; doi:10.1038/s42003-024-06820-3), 2024-09-10
Supplement: 42003_2024_6820_MOESM2_ESM.pdf [file 42003_2024_6820_MOESM2_ESM.pdf]

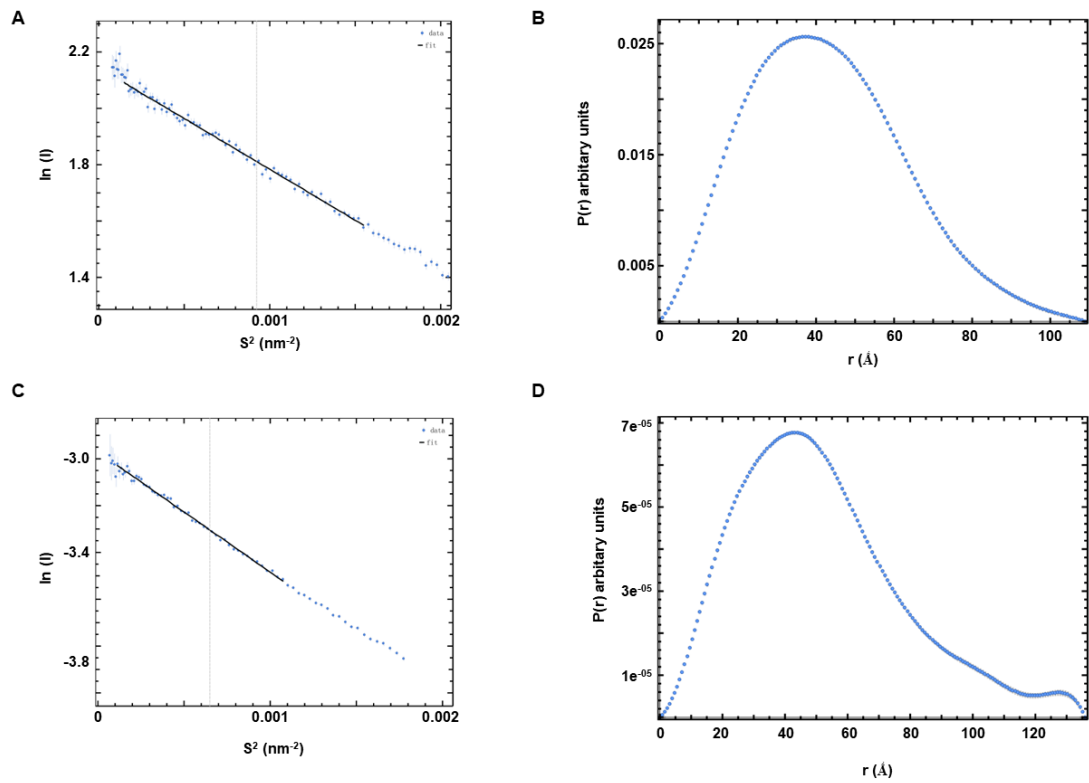

Supplementary Figure 1 SAXS data analysis for BCOR/PCGF1/KDM2B/SKP1 tetramer. (A) Guinier plots for BCOR<sup>1607</sup>/PCGF1<sup>RAWUL</sup>/KDM2B<sup>F-box-LRRs</sup>/SKP1. (B) P(r) functions for BCOR<sup>1607</sup>/PCGF1<sup>RAWUL</sup>/KDM2B<sup>F-box-LRRs</sup>/SKP1. (C) Guinier plots for BCOR<sup>ANK-linker-PUFD</sup>/PCGF1<sup>RAWUL</sup>/KDM2B<sup>F-box-LRRs</sup>/SKP1. (D) P(r) functions for BCOR<sup>ANK-linker-PUFD</sup>/PCGF1<sup>RAWUL</sup>/KDM2B<sup>F-box-LRRs</sup>/SKP1.

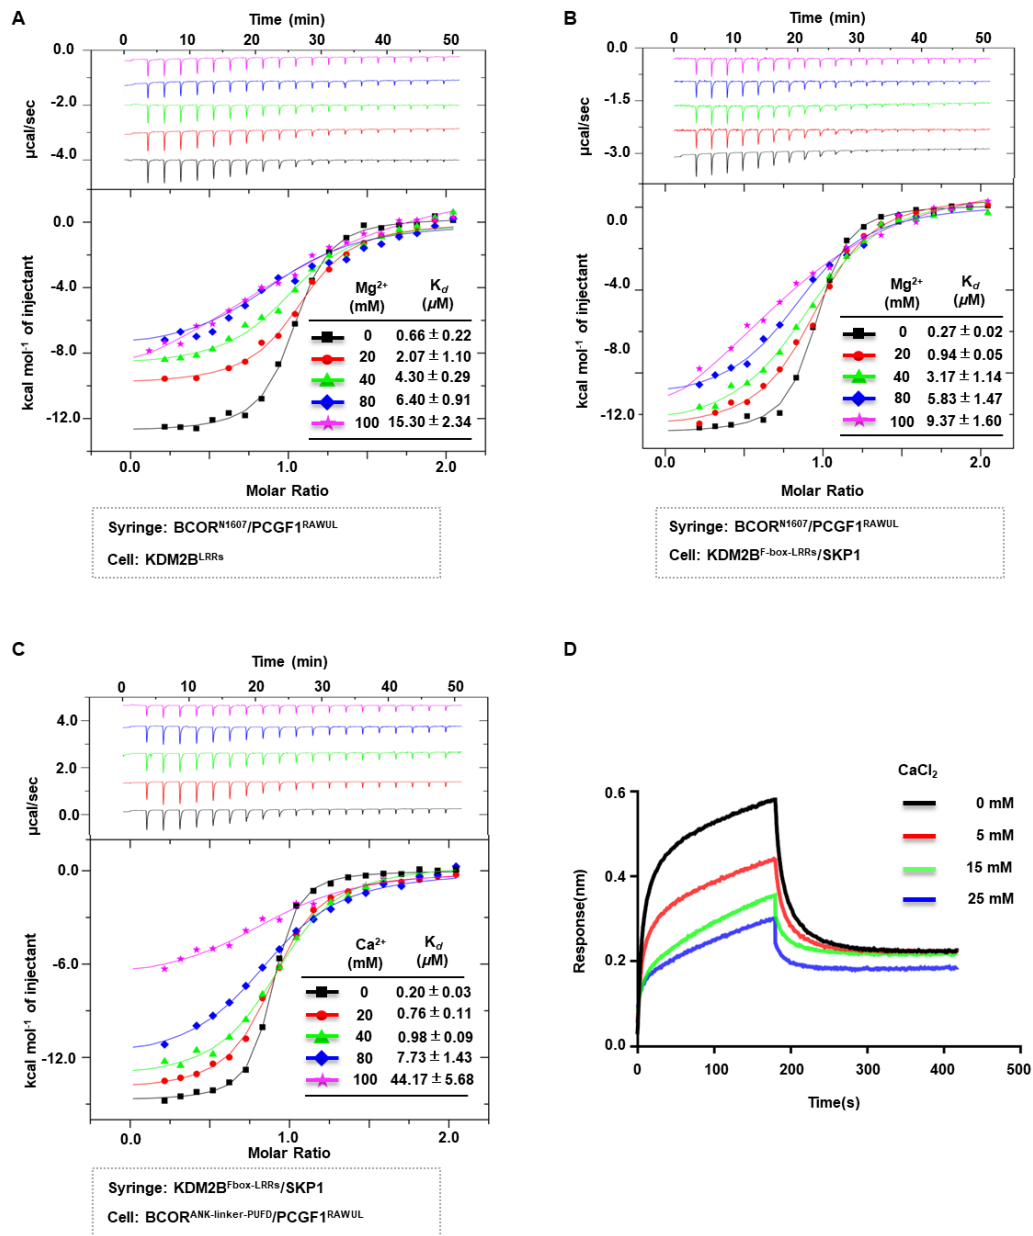

Supplementary Figure 2. Effect of magnesium or calcium on BCOR binding to KDM2B. (A-B) Binding affinity between BCOR<sup>N1607</sup>/PCGF1<sup>RAWUL</sup> and KDM2B<sup>LRRs</sup> (A) or KDM2B<sup>F-box-LRRs</sup>/SKP1 dimer (B) is determined using ITC in the presence of MgCl<sub>2</sub> at indicated concentration. MgCl<sub>2</sub> at indicated concentration was placed at both of cell and syringe. (C) Binding affinity between BCOR<sup>ANK-linker-PUFD</sup>/PCGF1<sup>RAWUL</sup> and KDM2B<sup>F-box-LRRs</sup>/SKP1 is determined using ITC in the presence of CaCl<sub>2</sub> at indicated concentration. CaCl<sub>2</sub> at indicated concentration was placed at both of cell and syringe. For (A-C), The K<sub>d</sub> values are shown as mean ± SD for triplicate experiments. (D) Effect of calcium on BCOR<sup>ANK-linker-PUFD</sup>/PCGF1<sup>RAWUL</sup> binding to KDM2B<sup>F-box-LRRs</sup>/SKP1 is determined using BLI assay. BCOR<sup>ANK-linker-PUFD</sup>/PCGF1<sup>RAWUL</sup> dimer was labeled with biotin and immobilized onto a

streptavidin biosensor.  $\text{KDM2B}^{\text{F-box-LRRs}}/\text{SKP1}$  acts as analyte in the buffer containing  $\text{CaCl}_2$  at indicated concentration.

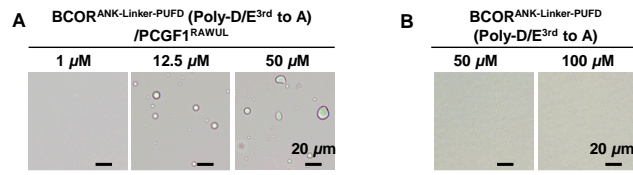

Supplementary Figure 3 LLPS assay of BCOR<sup>ANK-linker-PUFD</sup> (Poly-D/E<sup>3rd</sup> to A)/PCGF1<sup>RAWUL</sup> dimer (A), or BCOR<sup>ANK-linker-PUFD</sup> (Poly-D/E<sup>3rd</sup> to A) (B).

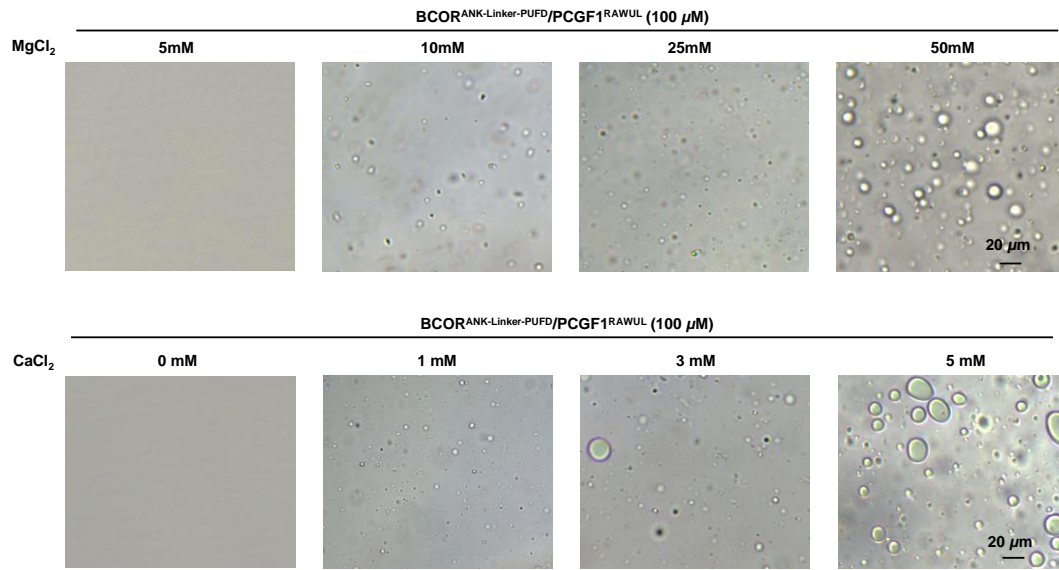

Supplementary Figure 4. Effect of MgCl<sub>2</sub> and CaCl<sub>2</sub> on inducing phase separation of BCOR<sup>ANK-linker-PUFD</sup>/PCGF1<sup>RAWUL</sup> hetero-dimer with concentration of 100  $\mu$ M

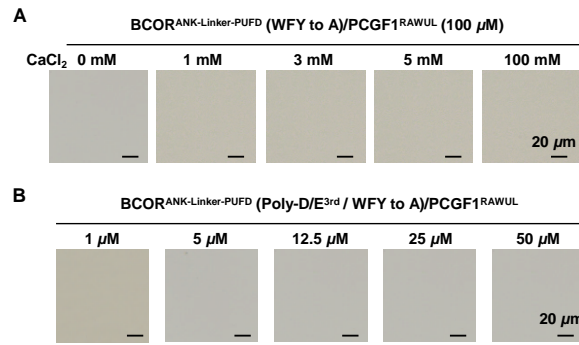

Supplementary Figure 5. The importance of aromatic residues on linker of BCOR for CaCl<sub>2</sub> induced phase separation of BCOR<sup>ANK-linker-PUFD</sup>/PCGF1<sup>RAWUL</sup> (A), and phase separation of BCOR<sup>ANK-linker-PUFD</sup>(Poly-D/E<sup>3rd</sup> to A)/PCGF1<sup>RAWUL</sup> (B).

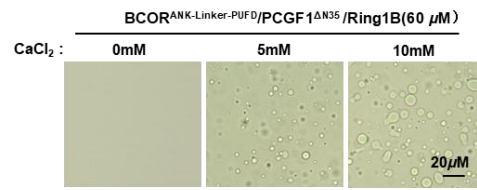

Supplementary Figure 6. Calcium induced LLPS of BCOR<sup>ANK-Linker-PUFD</sup>/PCGF1<sup>ΔN35</sup>/Ring1B

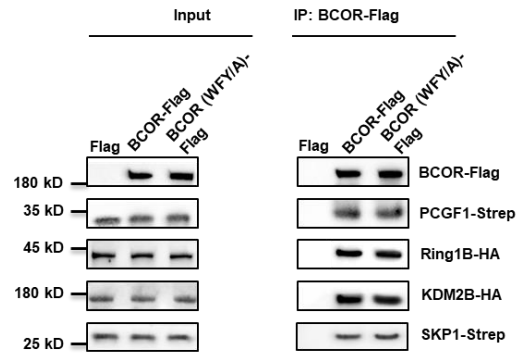

Supplementary Figure 7. The importance of aromatic residues (WFY) on linker for BCOR binding to KDM2B/SKP1 is assessed using Co-IP assay. Expressing plasmids for BCOR (wild or mutant), PCGF1, KDM2B or SKP1, were co-transfected into HEK293T cells. Co-IP was performed with anti-Flag magnetic beads, after 48h transfection. The western-blotting data is representative of two independent experiments.



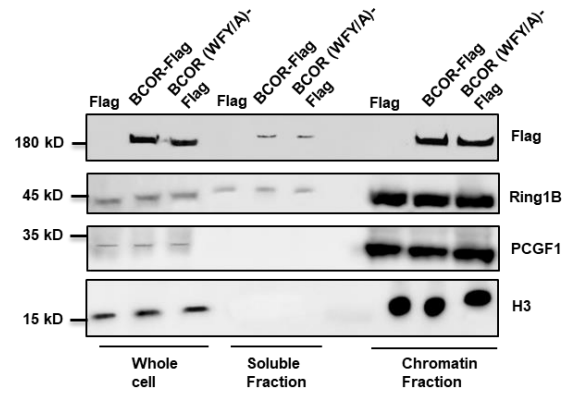

Supplementary Figure 8. The subcellular localizations of BCOR, RING1B and PCGF1 are determined by a biochemical fractionation assay in 293T cells upon transient expression of the Flag-tagged BCOR (wild type or mutant). Whole-cell extracts, the soluble and chromatin-binding fractions are analyzed by western-blotting. The western-blotting data is representative of two independent experiments.

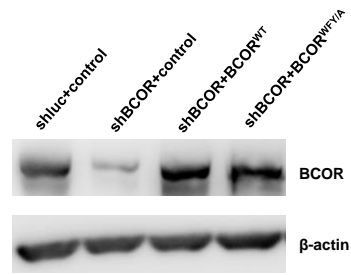

Supplementary Figure 9. Western blot analysis knockdown efficiency of BCOR in HEK293T cells, as well as the level of over-expressed BCOR (wild type or mutant) in HEK293T cells that knockdown endogenous BCOR.

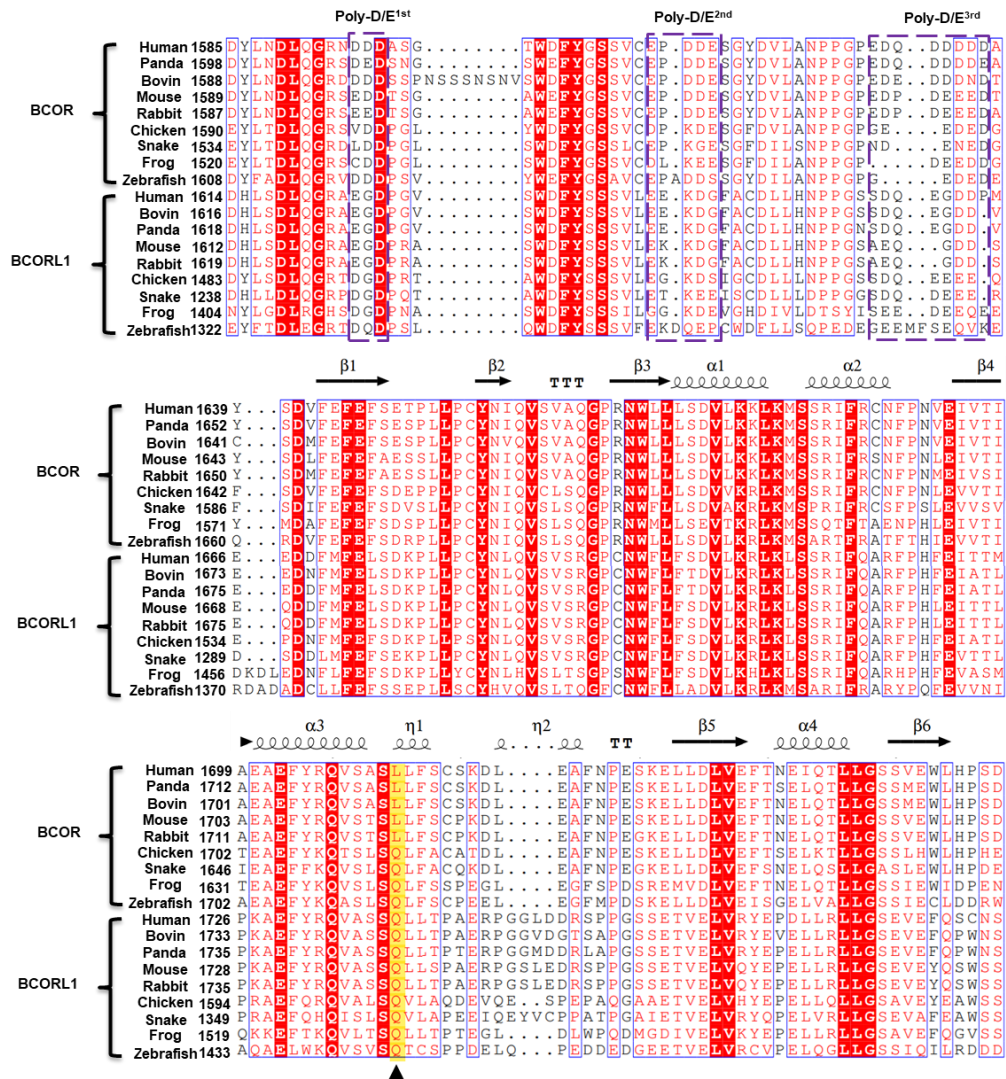

Supplementary Figure 10. Sequence alignment for BCOR and BCORL1 from different species.

Supplementary table 1. Residues cross-linked by BS<sub>3</sub> between KDM2B and PCGF1

| KDM2B | PCGF1 | Score |
|-------|-------|-------|
| K1111 | K234  | 3     |
| K1304 | K244  | 6     |
| K1304 | K255  | 3     |
| K1304 | K180  | 4     |
| K1304 | K184  | 3     |
| K1139 | K180  | 3     |
| K1139 | K190  | 8     |
| K1139 | K159  | 3     |
| K1334 | K255  | 3     |
| K1334 | K184  | 5     |

Supplementary table 2. Residues cross-linked by BS<sub>3</sub> between KDM2B and BCOR

| KDM2B | BCOR  | Score |
|-------|-------|-------|
| K1187 | K1674 | 11    |
| K1187 | K1568 | 7     |
| K1304 | K1674 | 11    |
| K1304 | K1711 | 4     |

Supplementary table 3. Residues cross-linked by EDC between SKP1 and BCOR

| SKP1 | BCOR  | Score |
|------|-------|-------|
| K78  | D1555 | 4     |
| K80  | D1522 | 5     |
| K121 | E1484 | 4     |
| K128 | E1518 | 3     |
| K142 | D1555 | 3     |

Supplementary table 4. SAXS sample details and parameters

|                                       | BCOR <sup>N1607</sup> /PCGF1 <sup>RAWUL</sup> /<br>KDM2B <sup>F-box-LRRs</sup> /SKP1 | BCOR <sup>ANK-linker-PUFD</sup> /PCGF1 <sup>RAWUL</sup> /<br>KDM2B <sup>F-box-LRRs</sup> /SKP1 |
|---------------------------------------|--------------------------------------------------------------------------------------|------------------------------------------------------------------------------------------------|
| <b>Data Collection Parameters</b>     |                                                                                      |                                                                                                |
| SEC-SAXS column                       | Superdex 200 Increase 10/300GL                                                       |                                                                                                |
| Loading concentration                 | 10 mg/ml                                                                             |                                                                                                |
| Flow rate                             | 0.5 mL/min                                                                           |                                                                                                |
| Solvent                               | 20 mM Tris-HCl pH 7.5, 150 mM NaCl                                                   |                                                                                                |
| <b>Structural Parameters</b>          |                                                                                      |                                                                                                |
| From Guinier fit                      |                                                                                      |                                                                                                |
| R <sub>g</sub> (Å)                    | 32.90                                                                                | 39.25                                                                                          |
| From <i>P(r)</i>                      |                                                                                      |                                                                                                |
| R <sub>g</sub> (Å) <sub>2</sub>       | 33.42                                                                                | 41.33                                                                                          |
| D <sub>max</sub> (Å)                  | 109                                                                                  | 136                                                                                            |
| <b>Molecular Mass Determination</b>   |                                                                                      |                                                                                                |
| MW (kDa) from Q(p)                    | 73.17                                                                                | 105.83                                                                                         |
| MW (kDa) from V(c)                    | 71.97                                                                                | 101.45                                                                                         |
| Estimate MW (kDa)                     | 68.78                                                                                | 91.18                                                                                          |
| <b>Ab initio analysis</b>             |                                                                                      |                                                                                                |
| χ <sup>2</sup> (GASBOR)               | 1.060                                                                                | 1.005                                                                                          |
| <b>Rigid-body modeling Validation</b> |                                                                                      |                                                                                                |
| χ <sup>2</sup> (CRYSOL)               | 1.04                                                                                 | 1.73                                                                                           |
