# Supplementary material for: Calcium modulates the tethering of BCOR-PRC1.1 enzymatic core to KDM2B via liquid-liquid phase separation
Source: PubMed Central journal article supplement — Commun Biol. 2024 Sep 10;7:1112. doi: 10.1038/s42003-024-06820-3 (PMC11387744; doi:10.1038/s42003-024-06820-3), 2024-09-10

Figure 1C

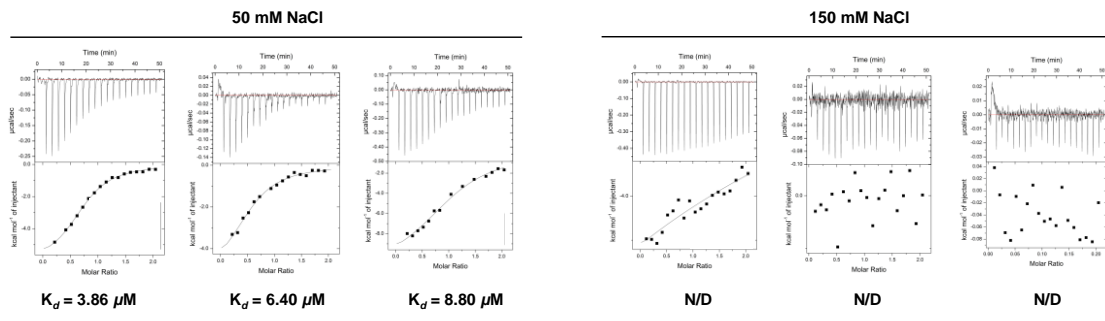

**Figure 1D**

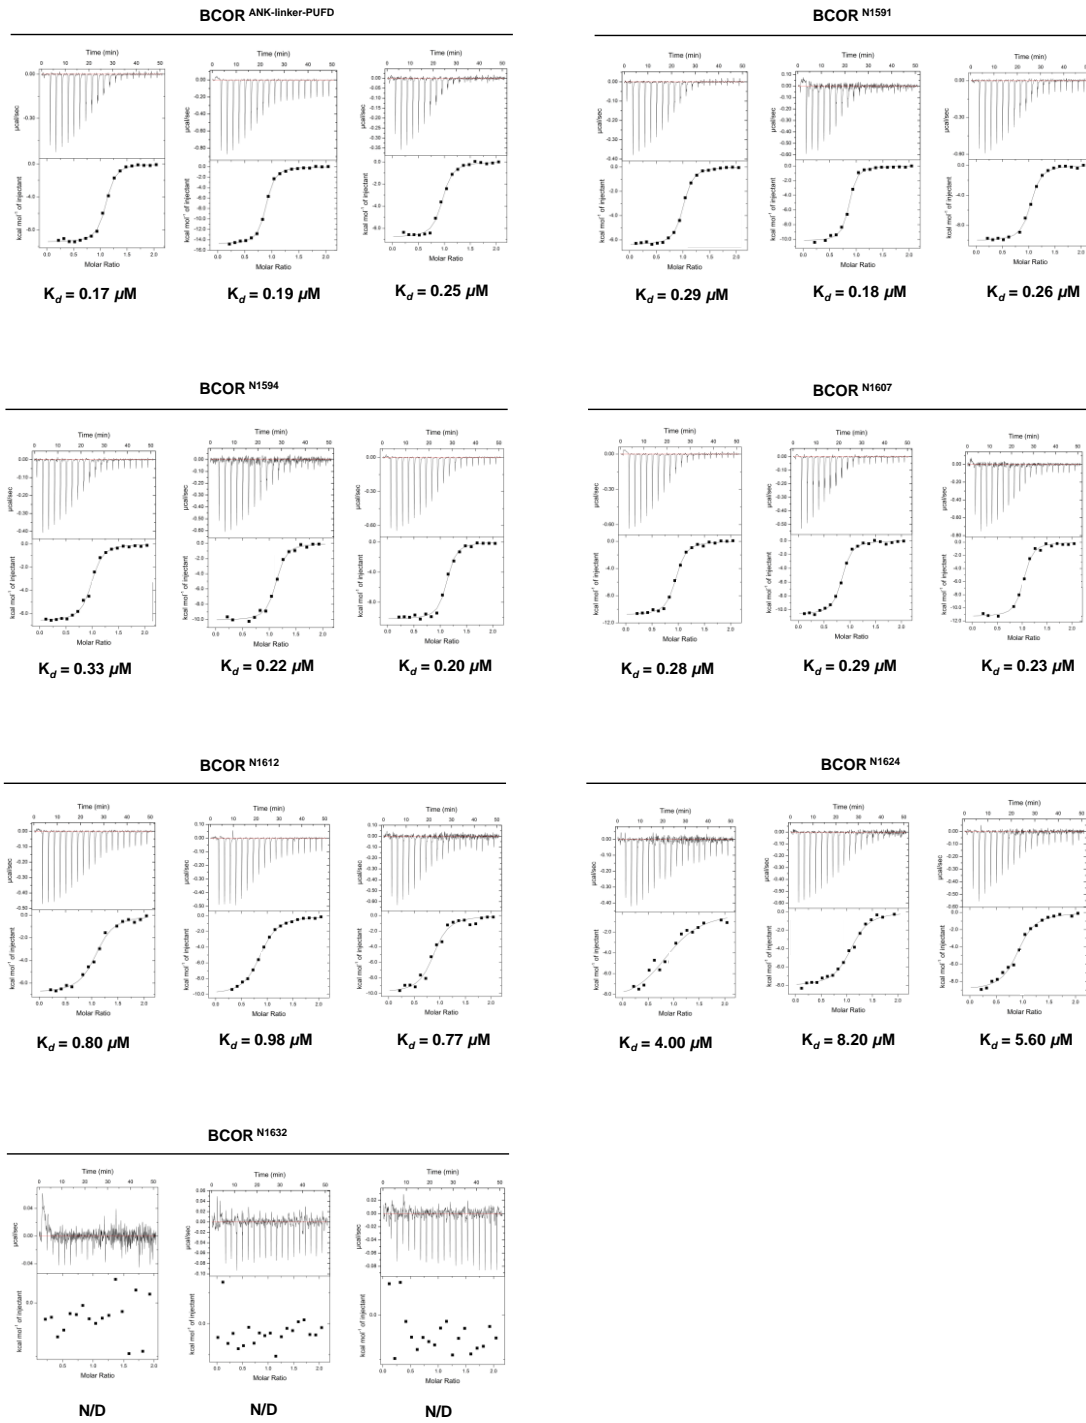

Figure 2B

BCOR ANK-linker-PUFD/PCGF1<sup>RAWUL</sup> binding to KDM2B<sup>F-box</sup>-LRRs/SKP1

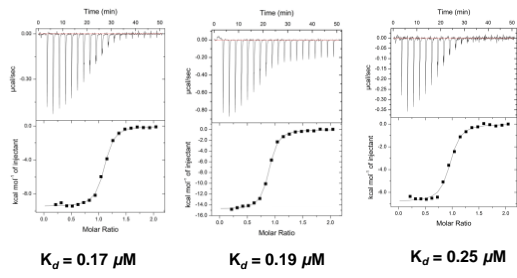

KDM2B W1143A

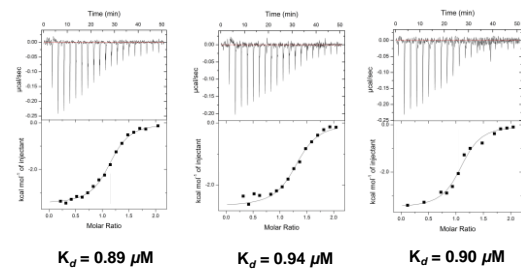

BCOR P1620/AP1621A

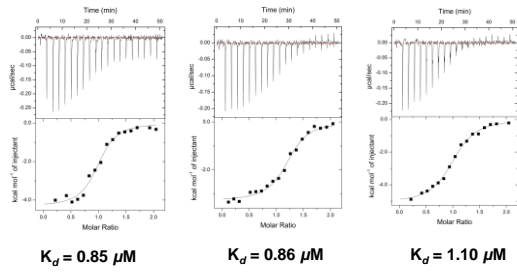

**Figure 3G**

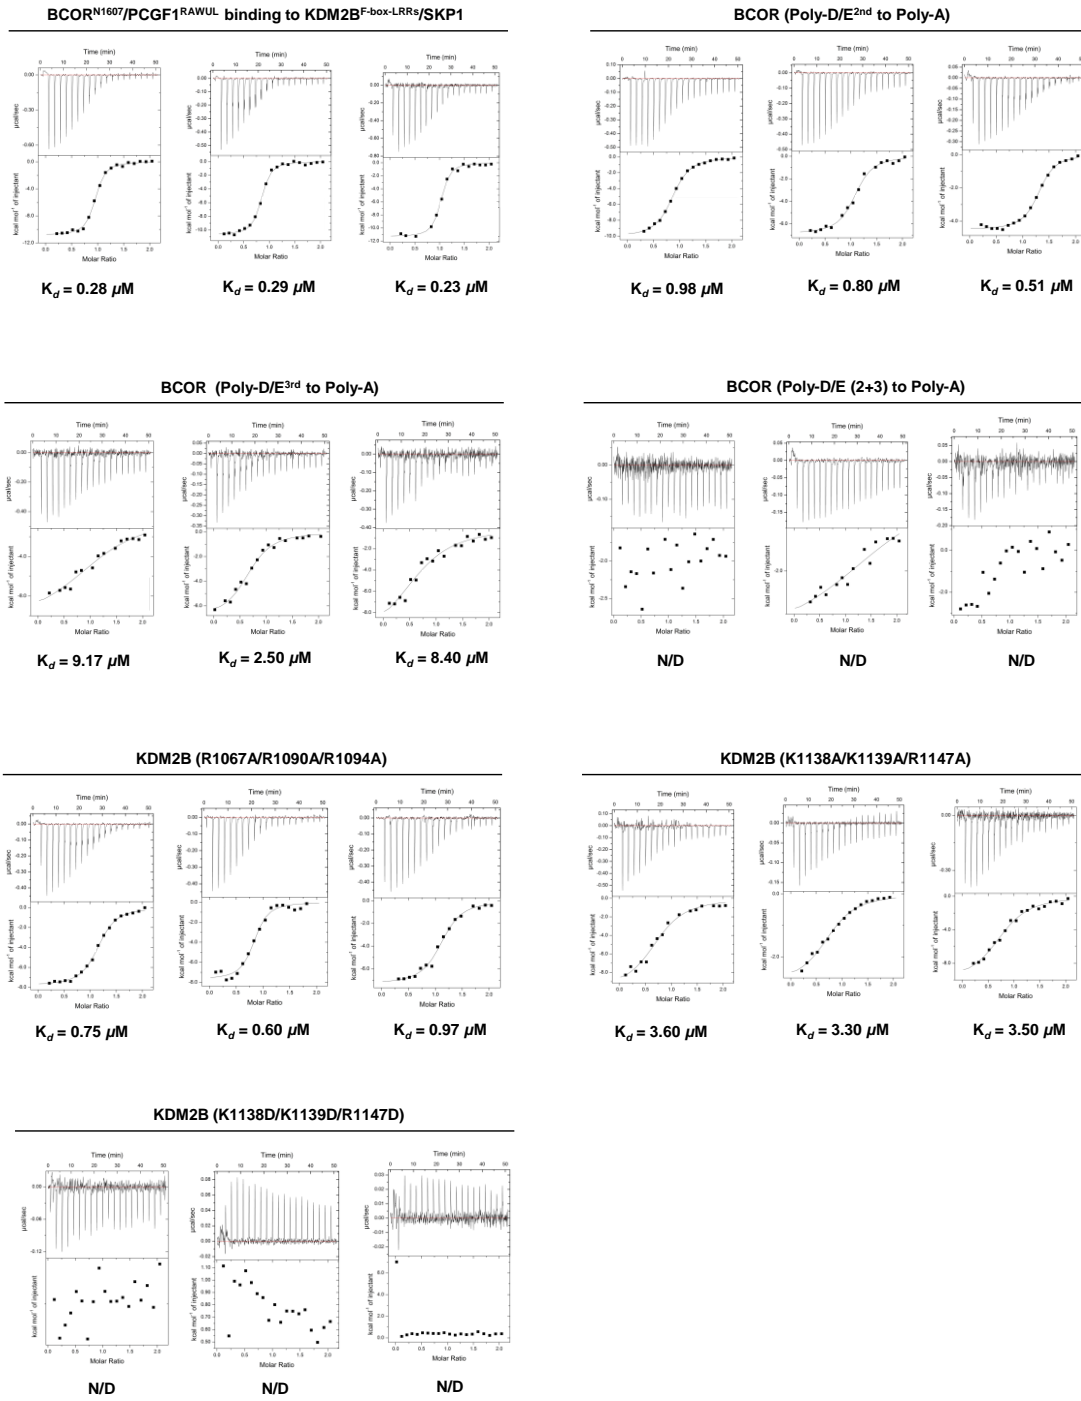

**Figure 6G**

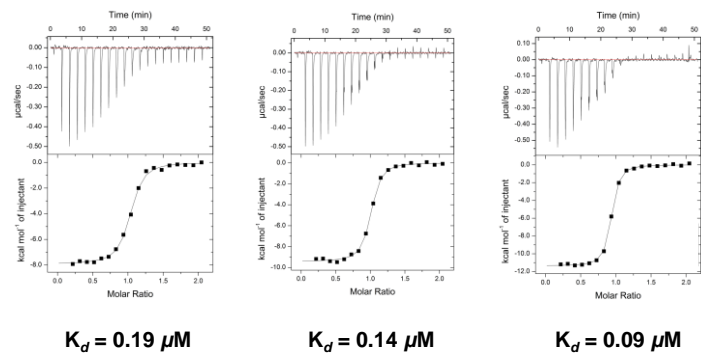

**$K_d = 0.19 \mu\text{M}$**

**$K_d = 0.14 \mu\text{M}$**

**$K_d = 0.09 \mu\text{M}$**

## Supplementary Figure 2A

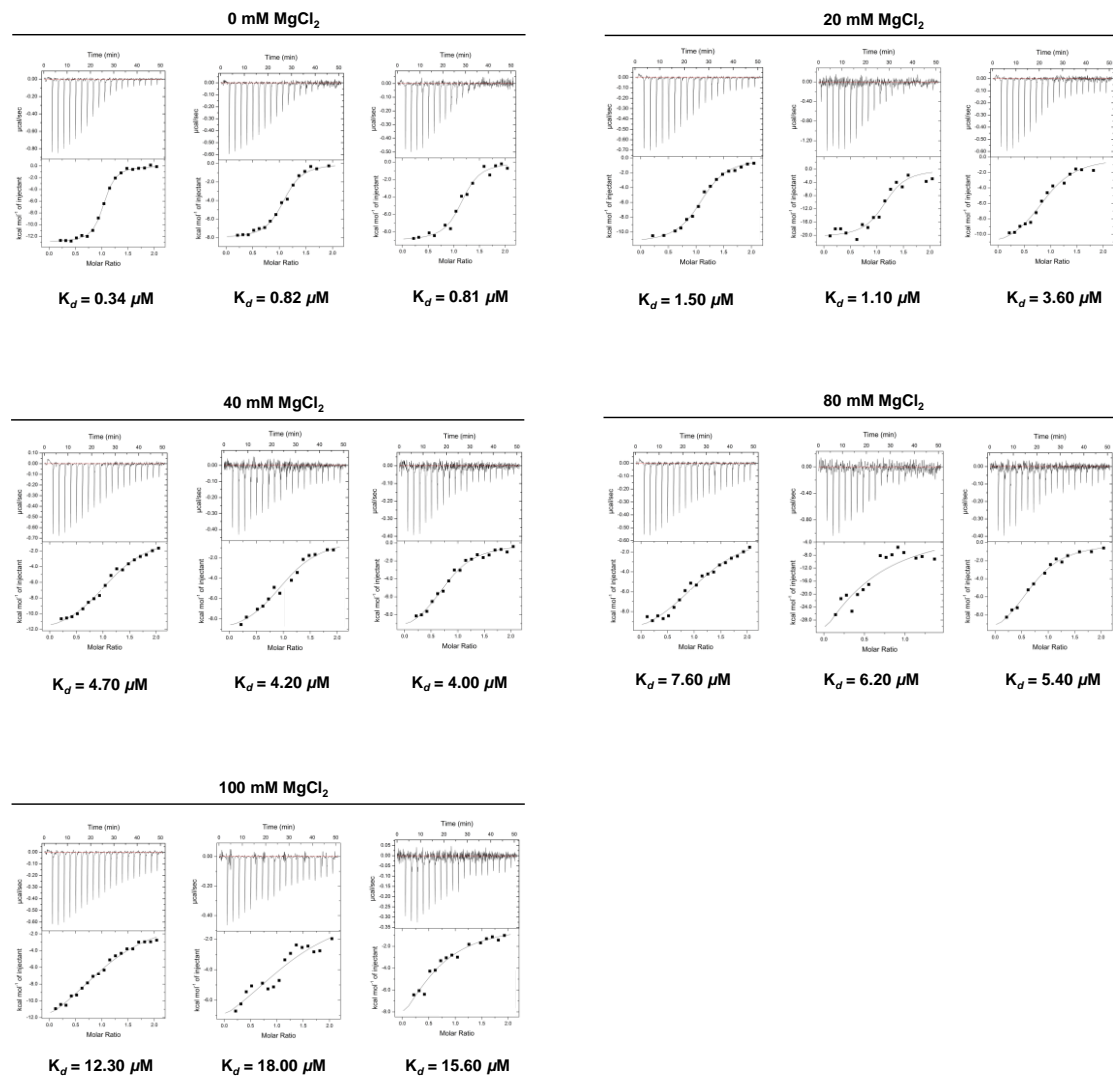

## Supplementary Figure 2B

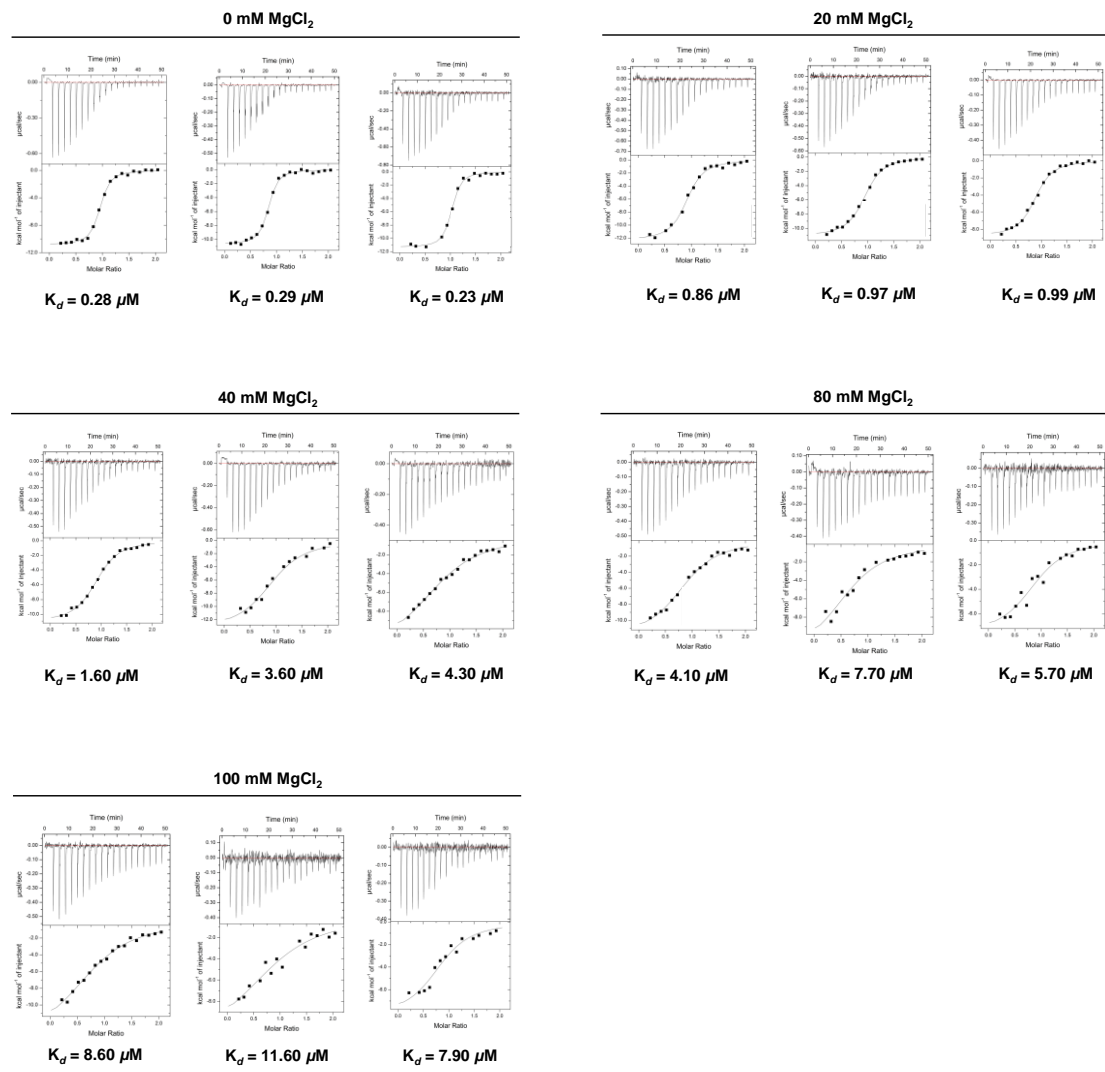

## Supplementary Figure 2C

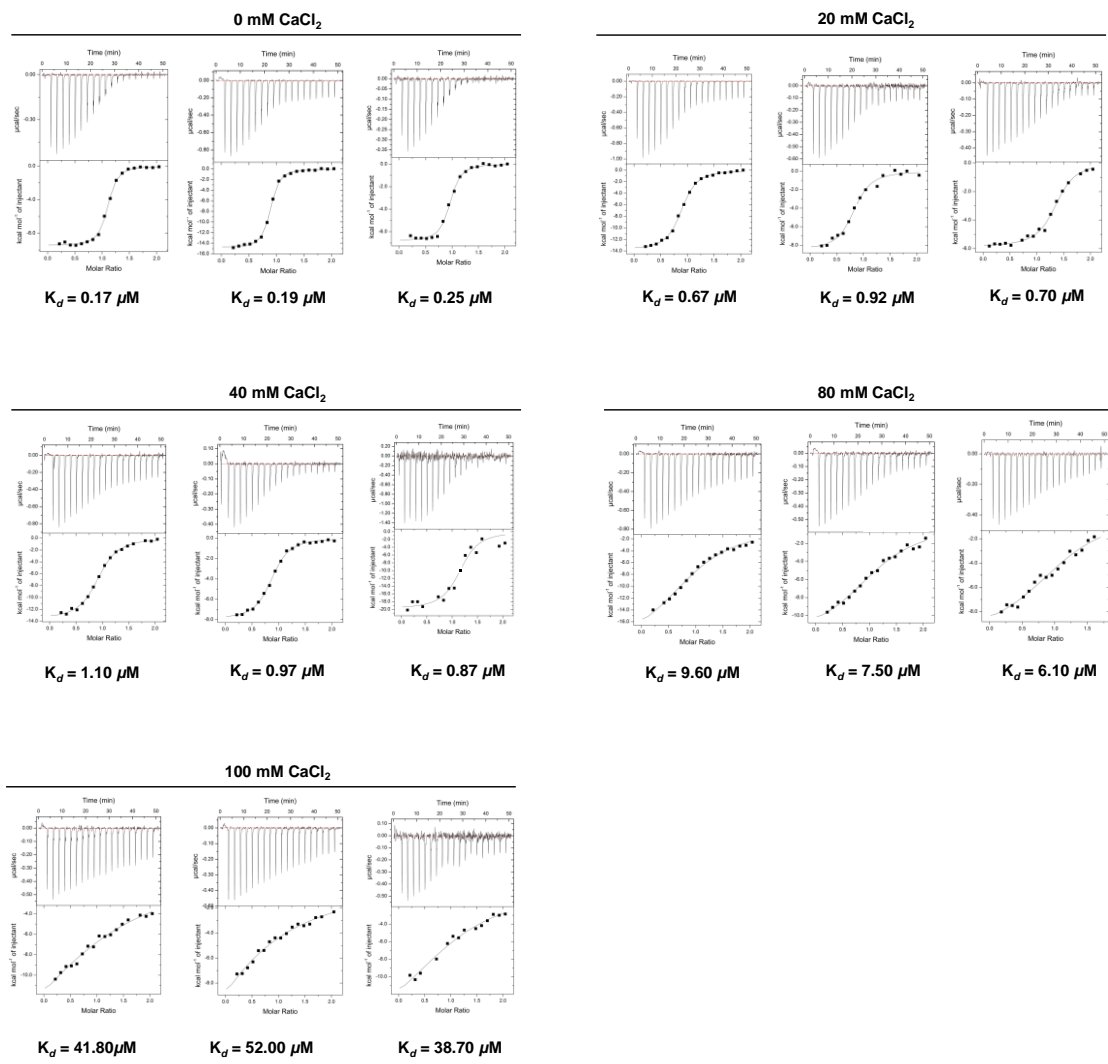

Supplement: 42003_2024_6820_MOESM4_ESM.pdf [file 42003_2024_6820_MOESM4_ESM.pdf]
