# Supplementary material for: Calcium modulates the tethering of BCOR-PRC1.1 enzymatic core to KDM2B via liquid-liquid phase separation
Source: PubMed Central journal article supplement — Commun Biol. 2024 Sep 10;7:1112. doi: 10.1038/s42003-024-06820-3 (PMC11387744; doi:10.1038/s42003-024-06820-3), 2024-09-10

1. Repeating data for Figure. 1E

(1)

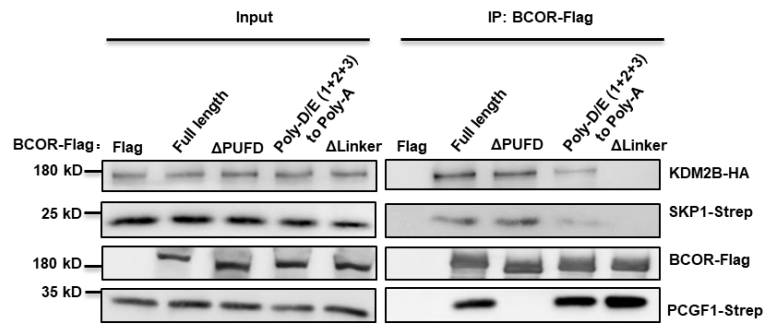

(2)

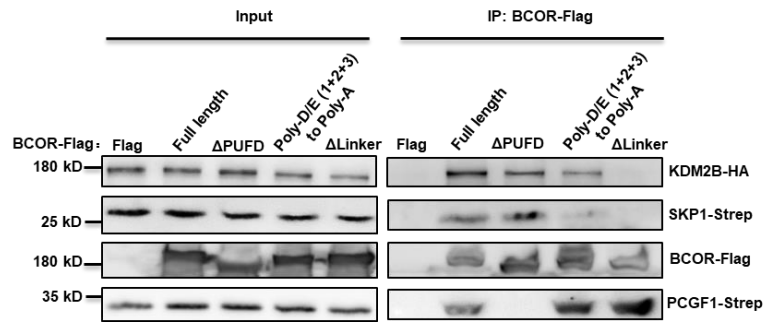

2. Repeating data for Figure. 4A

(1)

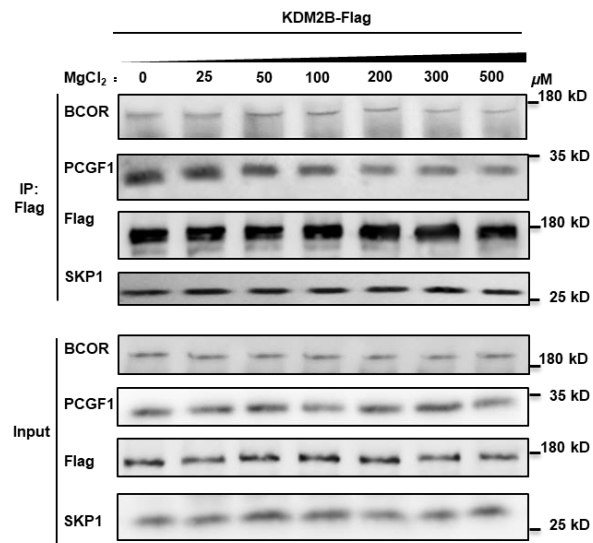

(2)

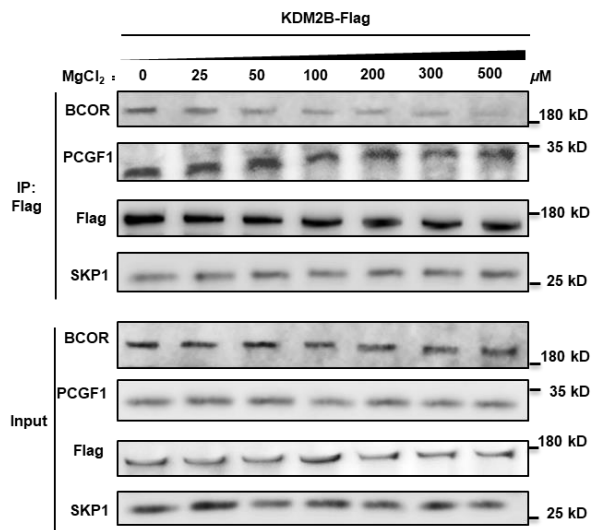

### 3. Repeating data for Figure. 4C

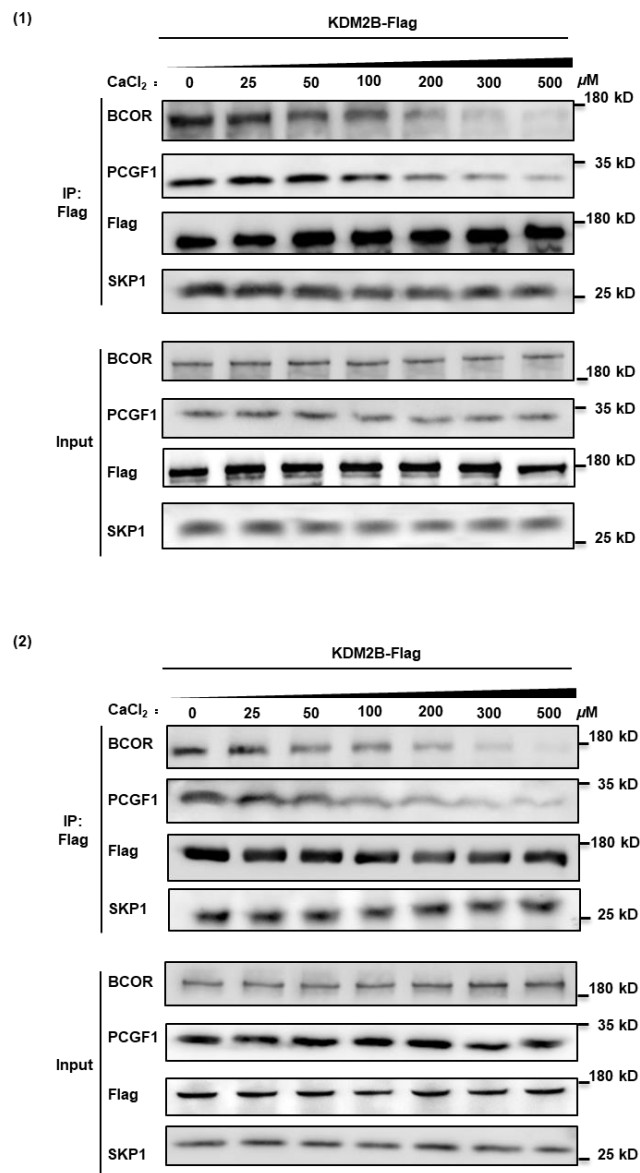

4. Repeating data for Supplementary Figure 7

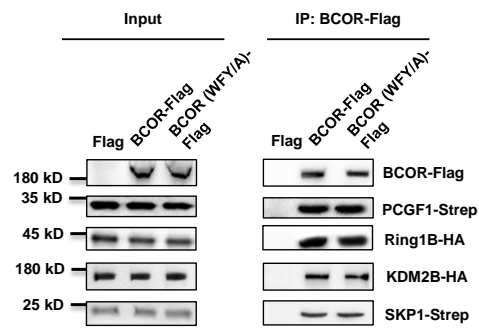

5. Repeating data for Supplementary Figure 8

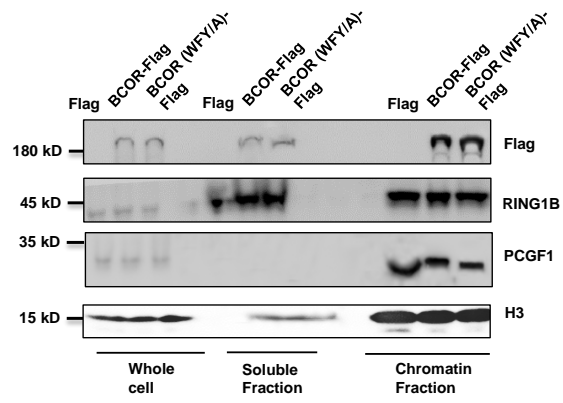

Supplement: 42003_2024_6820_MOESM5_ESM.pdf [file 42003_2024_6820_MOESM5_ESM.pdf]
